# Supplementary material for: Simultaneous prediction of trihalomethanes, haloacetic acids, haloacetonitriles and haloacetamides using simulated distribution system tests
Source: Royal Society of Chemistry journal article supplement (doi:10.1039/d1ew00824b), 2022-01-01
Supplement: d1ew00824b1.pdf [file d1ew00824b1.pdf]

# Supporting Information

## **Simultaneous prediction of trihalomethanes, haloacetic acids, haloacetonitriles and haloacetamides using simulated distribution system tests**

Chrysoula Sfynia <sup>a\*</sup>, Tom Bond <sup>b</sup>, Rakesh Kanda <sup>c</sup>, Michael R. Templeton <sup>a</sup>

- a. Department of Civil and Environmental Engineering, Imperial College London, London SW7 2AZ, UK.
- b. Department of Civil and Environmental Engineering, University of Surrey, Guildford GU2 7XH, UK.
- c. Institute of Environment, Health and Societies, Brunel University London, Uxbridge UB8 3PH, UK.

**Table S1:** Extraction and gas chromatography specifications and operational conditions in modified EPA Method 551.1, for THMs, HANs and HAcAms.

---

|                    |                                                                                             |
|--------------------|---------------------------------------------------------------------------------------------|
| <b>Extraction:</b> | Liquid-liquid extraction (LLE) with MTBE<br>Internal standard: bromofluorobenzene [1 µg/ml] |
|--------------------|---------------------------------------------------------------------------------------------|

---

|                        |                                                                                                                                                                                                                                                                                                             |
|------------------------|-------------------------------------------------------------------------------------------------------------------------------------------------------------------------------------------------------------------------------------------------------------------------------------------------------------|
| <b>Primary Column:</b> | RXi 5Sil MS, 30m · 0.25mm ID, 0.25 µm film thickness                                                                                                                                                                                                                                                        |
| <b>Injector:</b>       | Injector temperature –170 °C; 2 mm straight quartz liner; injection volume 1 µL; splitless injection hold for 45 seconds then purge at 30 mL/min.                                                                                                                                                           |
| <b>Carrier Gas:</b>    | Helium ( <i>set at constant pressure</i> ), velocity 33 cm/sec.                                                                                                                                                                                                                                             |
| <b>GC program:</b>     | <ul style="list-style-type: none"><li>▪ HOLD at 35°C for 22 minutes.</li><li>▪ INCREASE to 145°C at 10°C/min and hold at 145°C for 2 minutes.</li><li>▪ INCREASE to 225°C at 20°C/min and hold at 225°C for 15 minutes.</li><li>▪ INCREASE to 260°C at 10°C/min and hold at 260°C for 30 minutes.</li></ul> |
| <b>Total time:</b>     | 90 min/ sample                                                                                                                                                                                                                                                                                              |
| <b>Detector:</b>       | Agilent Micro ECD (150 µL); Detector temperature: 290 °C; Make up gas: 99.9% nitrogen at 30 mL/min.                                                                                                                                                                                                         |

---

**Table S2:** Extraction and gas chromatography specifications, and operational conditions in EPA Method 552.3 for HAAs.

---

|                    |                                                                                                                                     |
|--------------------|-------------------------------------------------------------------------------------------------------------------------------------|
| <b>Extraction:</b> | Liquid-liquid extraction (LLE) with MTBE, and derivatization via methylation<br>Internal standard: 1,2,3-trichloropropane [1 µg/ml] |
|--------------------|-------------------------------------------------------------------------------------------------------------------------------------|

---

|                        |                                                                                                                                                                                                                                           |
|------------------------|-------------------------------------------------------------------------------------------------------------------------------------------------------------------------------------------------------------------------------------------|
| <b>Primary column:</b> | DB-1701, 30m · 0.25mm ID, 0.25 µm film thickness.                                                                                                                                                                                         |
| <b>Injector:</b>       | Injector temperature – 210°C; 2 mm straight quartz liner; injection volume 1 µL; splitless injection hold for 45 seconds then purge at 30 mL/min.                                                                                         |
| <b>Carrier Gas:</b>    | Helium (set at constant pressure), velocity 33 cm/sec.                                                                                                                                                                                    |
| <b>GC program:</b>     | <ul style="list-style-type: none"><li>▪ HOLD at 40°C for 10 minutes.</li><li>▪ INCREASE to 65°C at 2.5°C/min.</li><li>▪ INCREASE to 85°C at 10°C/min.</li><li>▪ INCREASE to 205°C at 20°C/min, and hold at 205°C for 7 minutes.</li></ul> |
| <b>Total time:</b>     | 35 min/ sample                                                                                                                                                                                                                            |
| <b>Detector:</b>       | Agilent Micro ECD (150 µL); detector temperature: 290 °C; Make up gas: 99.9% nitrogen at 20 mL/min.                                                                                                                                       |

---

**Table S3:** DBP monitoring in numbers (MDL, recovery rate, n° of samples, median concentrations).

| Target Analyte |                           | MDL    | Recovery rate | Total samples | Samples   | Median               |
|----------------|---------------------------|--------|---------------|---------------|-----------|----------------------|
|                |                           | [µg/L] | [%]           | [n°]          | >MDL [n°] | concentration [µg/L] |
| <b>THMs</b>    | Chloroform                | 0.4    | 108           | 384           | 384       | 4.8                  |
|                | Bromodichloromethane      | 0.3    | 110           | 384           | 384       | 6.8                  |
|                | Dibromochloromethane      | 0.2    | 110           | 384           | 384       | 10.8                 |
|                | Bromoform                 | 0.4    | 98            | 384           | 376       | 7.7                  |
| <b>HAAs</b>    | Monochloroacetic acid     | 0.2    | 95.8          | 374           | 320       | 3.3                  |
|                | Monobromoacetic acid      | 0.5    | 92.2          | 374           | 358       | 1.4                  |
|                | Dichloroacetic acid       | 0.2    | 93.8          | 374           | 324       | 4.4                  |
|                | Trichloroacetic acid      | 0.2    | 105           | 374           | 364       | 0.9                  |
|                | Bromochloroacetic acid    | 0.1    | 98            | 374           | 96        | 2.6                  |
|                | Bromodichloroacetic acid  | 0.1    | 101           | 374           | 340       | 1.7                  |
|                | Dibromoacetic acid        | 0.7    | 110           | 374           | 338       | 2.5                  |
|                | Dibromochloroacetic acid  | 1      | 108           | 374           | 338       | 3.2                  |
|                | Tribromoacetic acid       | 1      | 90.6          | 374           | 320       | 2.9                  |
| <b>HANs</b>    | Dichloroacetonitrile      | 0.1    | 90            | 380           | 308       | 0.6                  |
|                | Trichloroacetonitrile     | 0.1    | 95            | 380           | 302       | 0.7                  |
|                | Dibromoacetonitrile       | 0.2    | 95            | 380           | 266       | 0.8                  |
|                | Bromochloroacetonitrile   | 0.2    | 110           | 380           | 312       | 0.6                  |
|                | Monochloroacetonitrile    | -      | n/a           | 380           | n/a       | n/a                  |
|                | Monobromoacetonitrile     | 0.1    | 90            | 380           | 82        | 0.1                  |
|                | Dibromochloroacetonitrile | 0.5    | 95            | 380           | 0         | n/a                  |
| <b>HAcAms</b>  | Monochloroacetamide       | -      | n/a           | 372           | n/a       | n/a                  |
|                | Monobromoacetamide        | 0.1    | 70            | 372           | 244       | 0.6                  |
|                | Dichloroacetamide         | 0.1    | 85            | 372           | 368       | 0.8                  |
|                | Trichloroacetamide        | 0.1    | 80            | 372           | 260       | 0.3                  |
|                | Dibromoacetamide          | 0.1    | 88            | 372           | 350       | 0.6                  |
|                | Bromochloroacetamide      | 0.1    | 73            | 372           | 326       | 0.8                  |
|                | Bromodichloroacetamide    | 0.1    | 70            | 372           | 306       | 0.3                  |
|                | Dibromochloroacetamide    | 0.1    | 71            | 372           | 190       | 0.3                  |
|                | Tribromoacetamide         | 0.1    | 70            | 372           | 280       | 0.3                  |

**Table S4:** Summary of water quality characteristics range of the chlorinated and chloraminated SDS tests (between 6-106 hours) during the seasonal samplings.

| WTW               | Units                | A            |           |         |         | B            |           |           |         | C              |         |         |           | D              |         |         |         |
|-------------------|----------------------|--------------|-----------|---------|---------|--------------|-----------|-----------|---------|----------------|---------|---------|-----------|----------------|---------|---------|---------|
| Sampling rounds   |                      | Autumn       | Winter    | Spring  | Summer  | Autumn       | Winter    | Spring    | Summer  | Autumn         | Winter  | Spring  | Summer    | Autumn         | Winter  | Spring  | Summer  |
| Disinfectant type | -                    | Chlorination |           |         |         | Chlorination |           |           |         | Chloramination |         |         |           | Chloramination |         |         |         |
| Disinf. residual  | mg/L Cl <sub>2</sub> | 0.9-0.2      | 0.7-0.2   | 1.0-0.2 | 1.1-0.3 | 0.6-0.2      | 0.6-0.3   | 0.6-0.4   | 1.1-0.4 | 1.2-0.9        | 1.0-0.3 | 0.9-0.5 | 1.0-0.5   | 0.6-0.2        | 0.8-0.6 | 1.0-0.2 | 1.0-0.2 |
| Water temperature | °C                   | 17.0         | 8.0       | 14.0    | 20.0    | 17.0         | 8.0       | 14.0      | 20.0    | 14.0           | 8.0     | 17.0    | 20.0      | 14.0           | 8.0     | 17.0    | 20.0    |
| TOC               | mg/L C               | 3.1-3.7      | 3.1-3.6   | 3.3-3.5 | 2.9-3.9 | 3.8          | 3.2-3.6   | 3.5-4.1   | 3.7-3.5 | 3.1-4.0        | 3.3-3.4 | 3.2-3.4 | 2.1-3.0   | 2.8-3.3        | 2.5-2.8 | 1.8-1.9 | 2.7-3.0 |
| pH                | -                    | 7.2          | 7.5-7.9   | 7.0-7.5 | 7.0-7.1 | n/a          | 7.2-7.7   | 7.0-7.7   | 7.2     | 6.9-7.3        | 7.6-7.7 | 7.4-7.6 | 7.4-7.5   | 6.5-7.3        | 7.3-7.5 | 7.3-7.5 | 7.5     |
| Bromide           | µg/L                 | <12.0        | <12.0     | <12.0   | <12.0   | <12.0        | 18.3      | <12.0     | 12.0    | 82             | 85.1    | 76      | 80.0      | 13.2           | 19.9    | 26.4    | <12.0   |
| UV <sub>abs</sub> | 1/M·cm               | n/a          | 0.04-0.06 | 0.06    | n/a     | n/a          | 0.04-0.06 | 0.04-0.07 | n/a     | n/a            | 0.06    | 0.04    | 0.05-0.06 | 0.03-0.05      | 0.06    | 0.04    | 0.05    |
| SUVA              | -                    | n/a          | 1.2-1.6   | 1.8     | n/a     | n/a          | 1.2-1.9   | 1.1-1.6   | n/a     | n/a            | 1.7     | 1.4     | 2.3-2.6   | 1.0-1.7        | 2.1-2.3 | 2.2-2.3 | 1.9     |

**Table S5:** Key concept and equation of the weight ratios [%].

The weight ratios [%], also referred as mass percent composition, can be abbreviated as w/w %. This is a type of generic calculation that enables us to assess the ratio of specific species/sub-species against the sum of a category. In DBP analysis, the weight ratio term is usually calculated to assess the contribution of brominated species of a specific class to the sum of species (total). Also, this calculation was used to calculate the contribution of HAA5 against HAA9. In this study the following equation was used to calculate the weight ratios:

$$\text{Weight-Ratio [\%]} = \text{Concentration of sub-category [mg/L]} / \text{Concentration of category (total) [mg/L]} \times 100$$

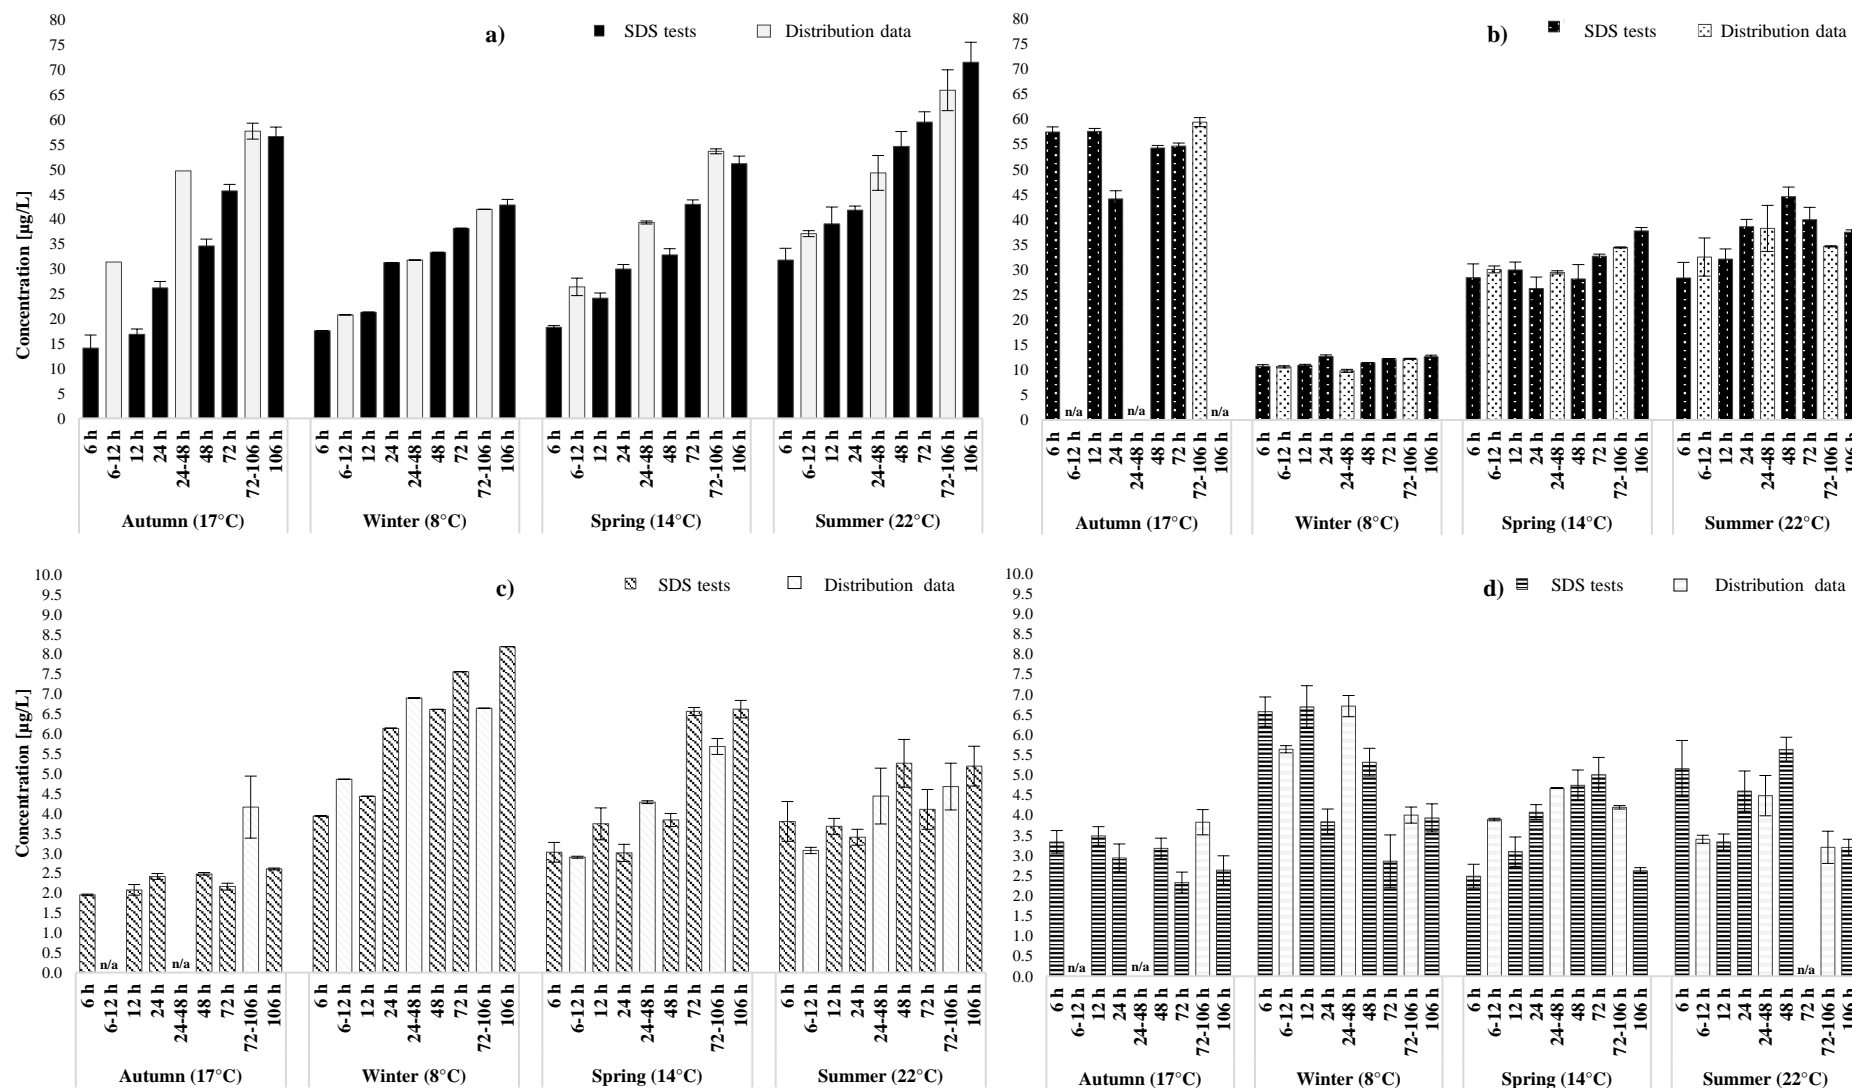

**Figure S1:** DBP occurrence of **a)** THMs, **b)** HAAs, **c)** HANs and **d)** HAcAms from SDS tests (6, 12, 24, 48, 72, 106 hours) and actual distribution samples (6-12, 24-48, 72-106 hours) in **chlorinated** water treatment works **B** (4 seasonal rounds).

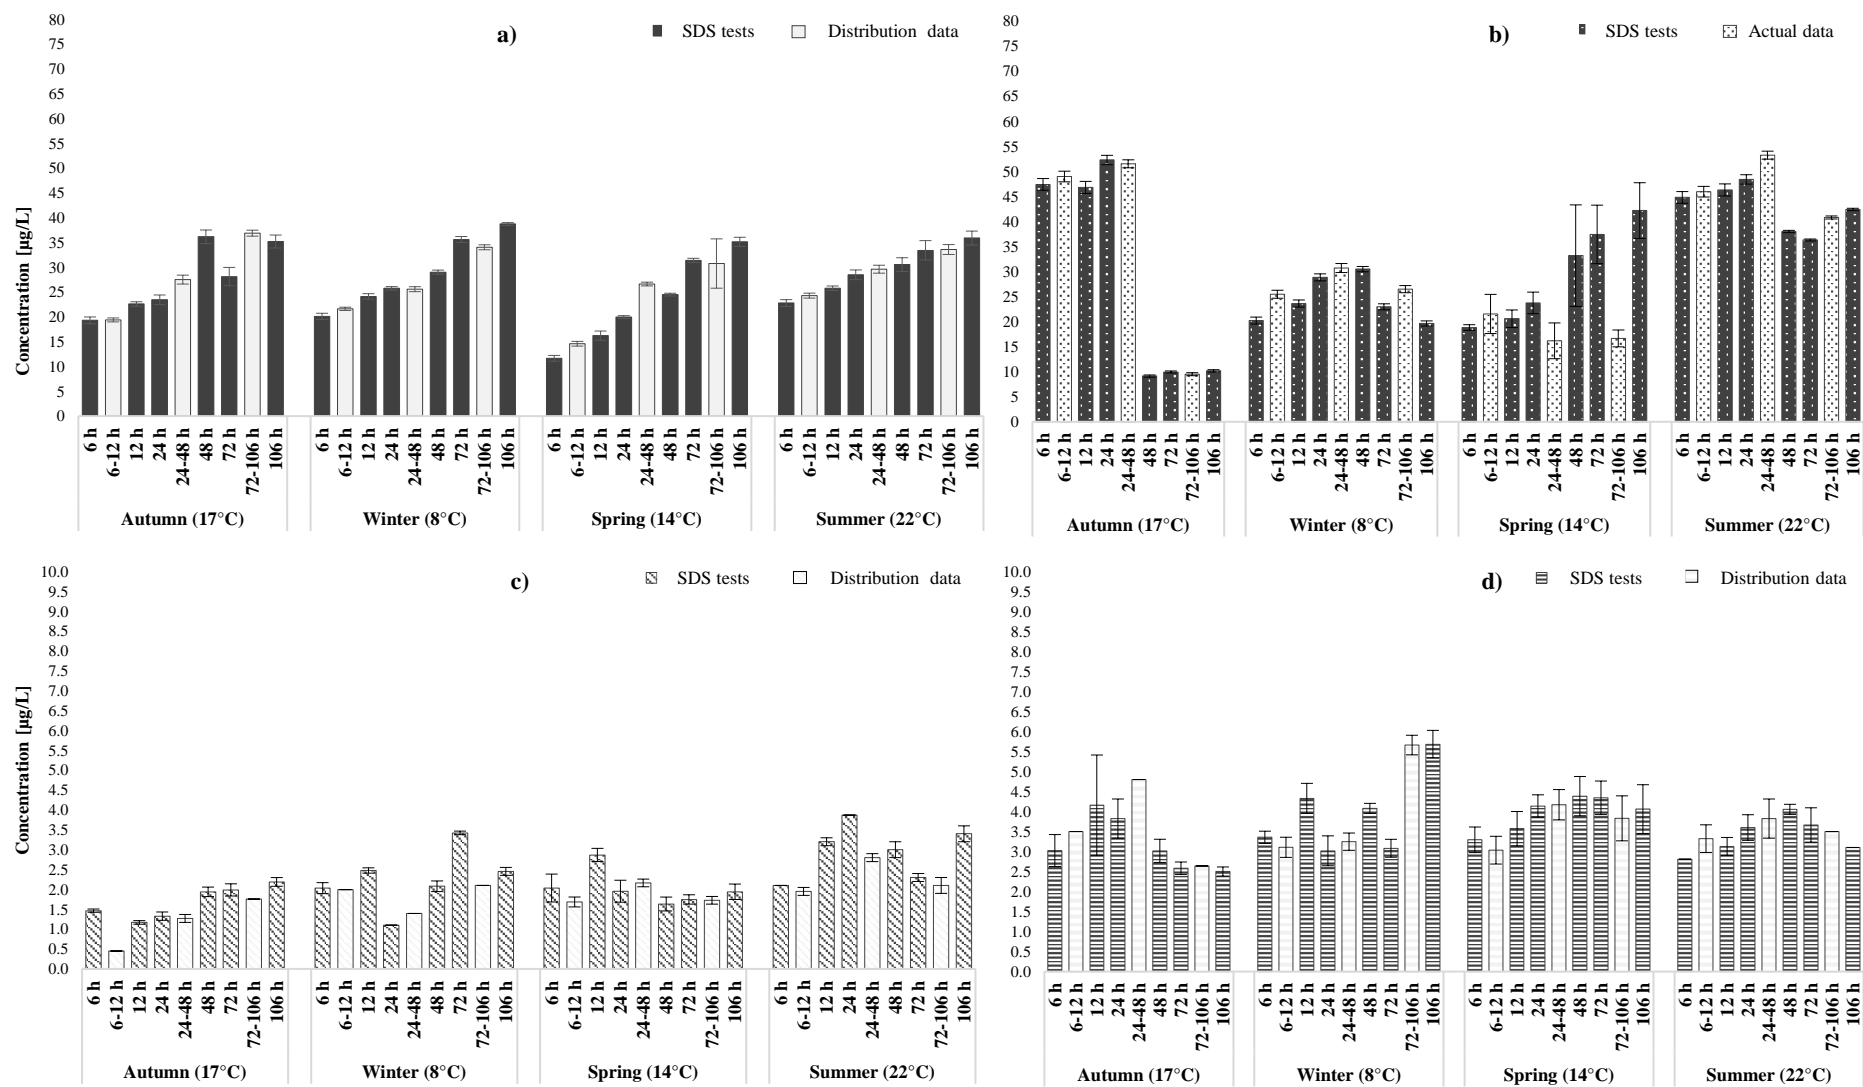

**Figure S2:** DBP occurrence of a) THMs, b) HAAs, c) HANs and d) HAcAms from SDS tests (6, 12, 24, 48, 72, 106 hours) and actual distribution samples (6-12, 24-48, 72-106 hours) in chloraminated water treatment works D (4 seasonal rounds).
